# Supplementary material for: Phenoxazinone Synthase Functional Mimic Activity of Mixed-ligand Copper(II) Complexes of L-proline and Diimine Ligands Conjugated with Chitosan
Source: Research Square preprint supplement (doi:10.21203/rs.3.rs-7918334/v1), 2025-10-23
Supplement: Supplementary file 1 [file 54b489e6d5bc13b22ae0e579.docx]

**SUPPLEMENTARY MATERIALS**

**Phenoxazinone Synthase Functional Mimic Activity of Mixed-ligand Copper(II) Complexes of L-proline and Diimine Ligands Conjugated with Chitosan**

Liji Muthirakalayil Abraham,a Manikandan Varadhan,a  Kugan Mahalingam,a Thangaraja Chinnathangavel,b and Venugopal Rajendiran,*a

*aDepartment of Chemistry, School of Basic and Applied Sciences, Central University of Tamil Nadu, Thiruvarur 610101, India*

*bDepartment of Chemistry, Anna University Regional Campus, Madurai 625019, India*

*Corresponding Author: Venugopal Rajendiran, Email: [rajendiran@cutn.ac.in](mailto:rajendiran@cutn.ac.in)

| **Sl.No.** | **Content** | **Page No.** |
| --- | --- | --- |
| 1 | Figure S1. 1H NMR spectra of (a) and (b) correspond to Boc-Proline-chitosan and chito-pro, respectively. (c) and (d) correspond to 13C NMR spectrum of Boc-Proline-chitosan and chito-pro, respectively, in D2O. | S3 |
| 2 | **Figure S2.** FT-IR Spectrum of Ligand(**L**) | S5 |
| 3 | **Figure S3.** FT-IR Spectrum of Complex **1** | S5 |
| 4 | **Figure S4.** FT-IR Spectrum of Complex **2** | S6 |
| 5 | **Figure S5.** 1H NMR of APX | S6 |
| 6 | **Figure S6.** HR-MS spectrum of APX | S7 |
| 7 | **Table S1.** Comparison of FT-IR Data | S8 |


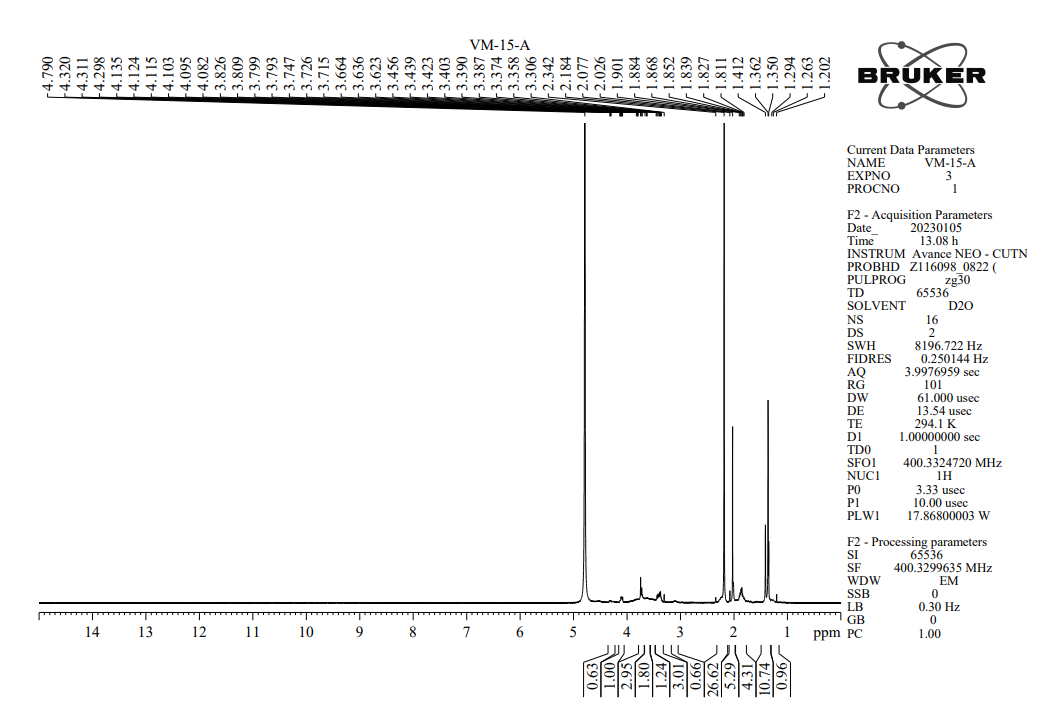


**(a)**


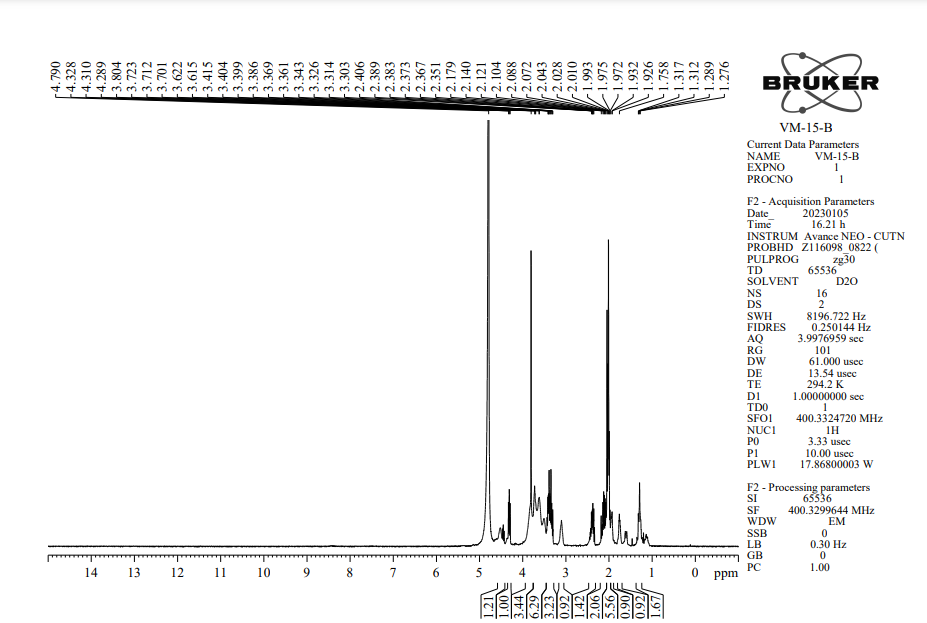


**(b)**


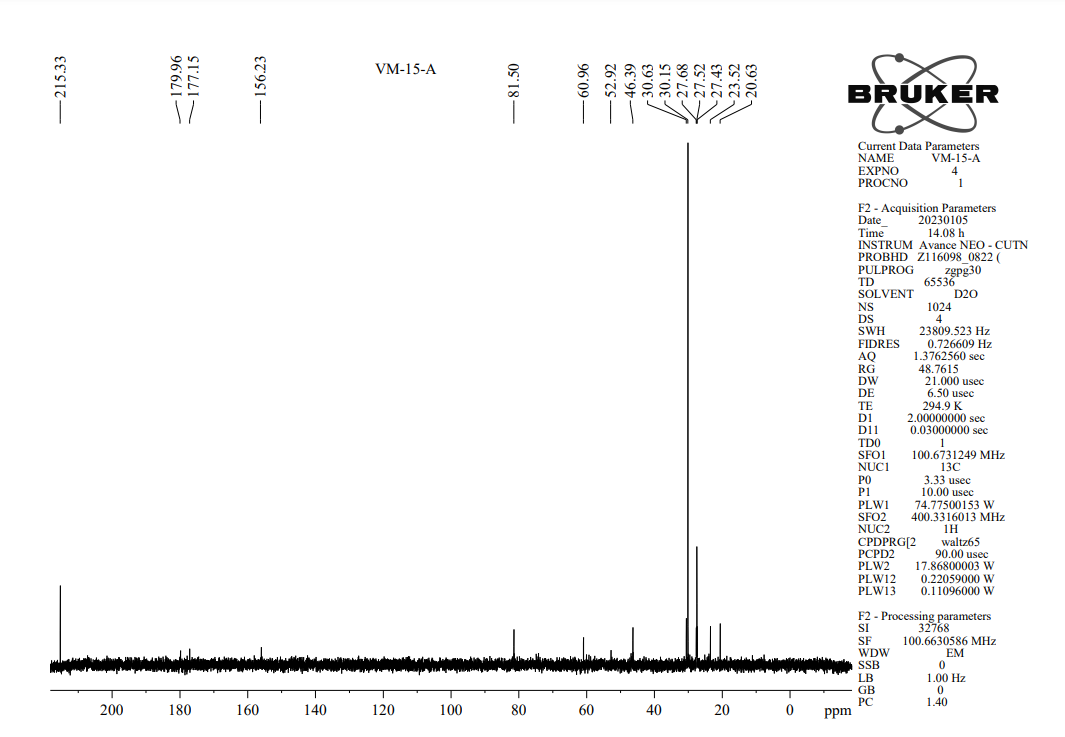


**(c)**


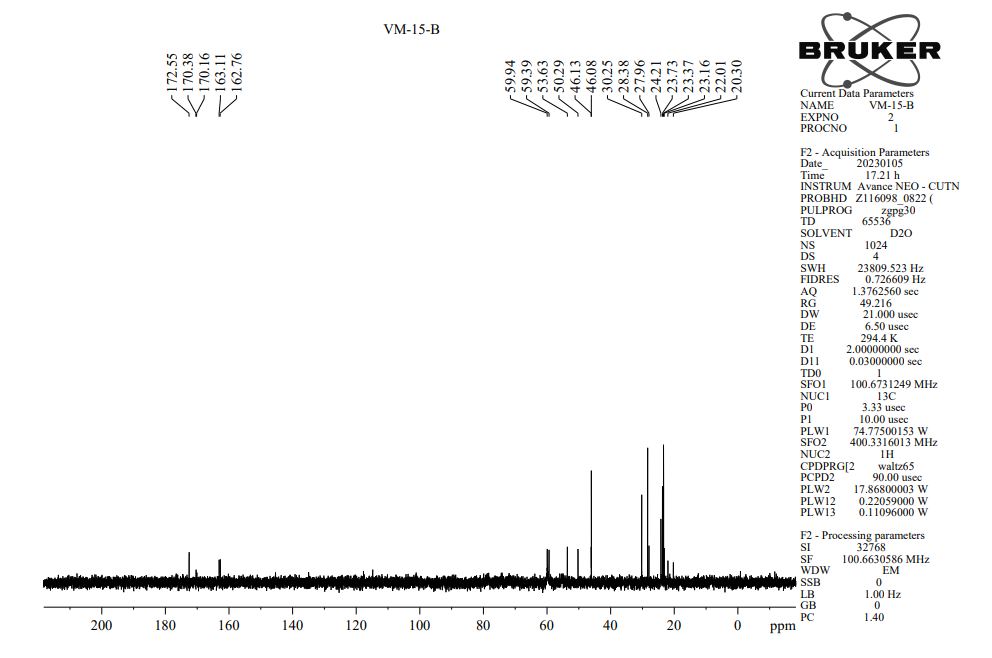


**(d)**

**Figure S1.** 1H NMR spectra of (a) and (b) correspond to Boc-Proline-chitosan and chito-pro, respectively. (c) and (d) correspond to 13C NMR spectrum of Boc-Proline-chitosan and chito-pro, respectively, in D2O.

**Figure S2.** FT-IR Spectrum of Ligand(**L**)

**Figure S3.** FT-IR Spectrum of Complex **1**

**Figure S4.** FT-IR Spectrum of Complex **2**

**
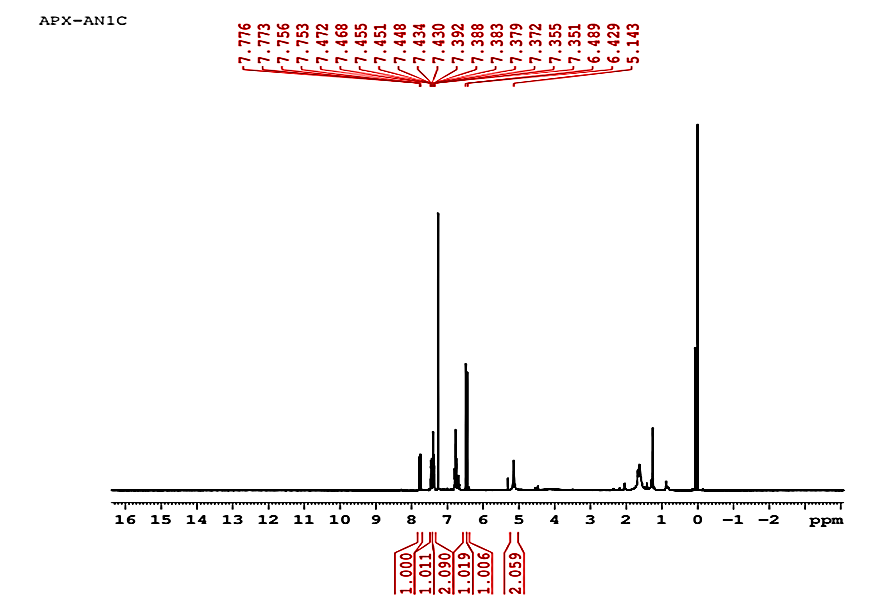
**

**Figure S5.** 1H NMR of APX


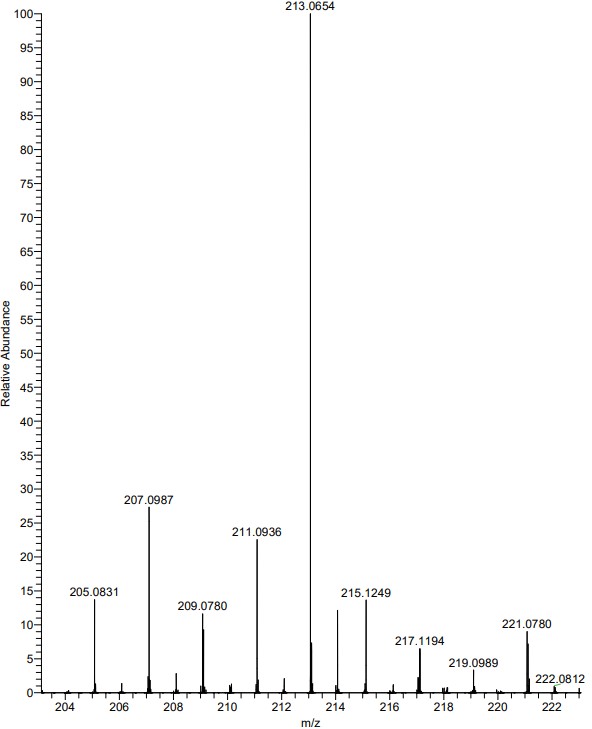

**Figure S6.** HR-MS spectrum of APX

**Table S1. Comparison of FT-IR Data**

| Functional groups | L  (cm-1) | 1  (cm-1) | 2  (cm-1) |
| --- | --- | --- | --- |
| ν(N-H) | 3268 | 3081 | 2897 |
| ν(C=N) | - | 1566 | 1598 |
| ν(-OH)bend | 1406 | 1425 | 1449 |
| ν(C-H)S | 2935 | 3081 | 2897 |
| ν(C=O) | 1699 | 1610 | 1601 |
| ν(Cu-N) | - | 430 | 413 |
| ν(O-C-O) | 1092 | 1082 | 1092 |
| ν(C-H)out of plane | 612 | 619 | 618 |
